# Supplementary material for: DFT, ADMET and Molecular Docking Investigations for the Antimicrobial Activity of 6,6′-Diamino-1,1′,3,3′-tetramethyl-5,5′-(4-chlorobenzylidene)bis[pyrimidine-2,4(1H,3H)-dione]
Source: MDPI journal article supplement (doi:10.3390/molecules27030620), 2022-01-18
Supplement: s1 [file s1]

The vibrational frequency results obtained from the optimized structural parameters by using the same level of calculations (B3LYP method with 6-311G\*\* basis set).

The entire vibrational assignments of wave numbers were made on the basis of potential energy distribution (PED) by VEDA 4 program

| Mode No. | Type | Bond | Calculated Frequency | PED% | Mixed Mode | PED% |
|----------|------|------|----------------------|------|------------|------|
| 1        | STRE | NH   | f3677                | 19   | f3557      | 80   |
| 2        | STRE | NH   | f3677                | 80   | f3557      | 19   |
| 3        | STRE | NH   | f3678                | 93   |            |      |
| 4        | STRE | NH   | f3574                | 94   |            |      |
| 5        | STRE | CH   | f3192                | 99   |            |      |
| 6        | STRE | CH   | f3206                | 98   |            |      |
| 7        | STRE | CH   | f3200                | 95   |            |      |
| 8        | STRE | CH   | f3156                | 96   |            |      |
| 9        | STRE | CH   | f3086                | -96  |            |      |
| 10       | STRE | CH   | f3024                | 90   |            |      |
| 11       | STRE | CH   | f3171                | 93   |            |      |
| 12       | STRE | CH   | f3182                | 87   | f3059      | 13   |
| 13       | STRE | CH   | f3117                | 100  |            |      |
| 14       | STRE | CH   | f3182                | -13  | f3059      | 86   |
| 15       | STRE | CH   | f3180                | 86   | f3058      | 13   |
| 16       | STRE | CH   | f3168                | 92   |            |      |
| 17       | STRE | CH   | f2970                | 100  |            |      |
| 18       | STRE | CH   | f3116                | -99  |            |      |
| 19       | STRE | CH   | f3180                | -13  | f3058      | 86   |
| 20       | STRE | CH   | f3083                | -94  |            |      |
| 21       | STRE | CH   | f3020                | 88   |            |      |
| 22       | STRE | OC   | f1719                | -72  |            |      |
| 23       | STRE | OC   | f1766                | -76  |            |      |
| 24       | STRE | OC   | f1728                | -70  |            |      |
| 25       | STRE | OC   | f1771                | 72   |            |      |
| 26       | STRE | CC   | f1678                | -14  | f1646      | 43   |
| 27       | STRE | CC   | f1619                | 49   |            |      |
| 28       | STRE | CC   | f1443                | 10   | f1321      | -16  |
| 29       | STRE | CC   | f1443                | 18   | f1391      | 18   |
| 30       | STRE | CC   | f1632                | -48  | f1202      | -19  |
| 31       | STRE | CC   | f1100                | 66   |            |      |
| 32       | STRE | CC   | f1632                | 15   | f1615      | 42   |

|    |      |     |       |     |       |     |
|----|------|-----|-------|-----|-------|-----|
| 33 | STRE | NC  | f1051 | -11 |       |     |
| 34 | STRE | NC  | f1489 | 13  | f1219 | 17  |
| 35 | STRE | NC  | f1462 | 14  | f1388 | 20  |
| 36 | STRE | NC  | f1489 | -13 |       |     |
| 37 | STRE | NC  | f1209 | 22  |       |     |
| 38 | STRE | NC  | f1487 | 13  | f1285 | -11 |
| 39 | STRE | NC  | f1057 | -38 |       |     |
| 40 | STRE | NC  | f1072 | -12 | f1061 | 36  |
| 41 | STRE | NC  | f468  | -11 |       |     |
| 42 | STRE | NC  | f1051 | 10  | f470  | -15 |
| 43 | STRE | NC  | f1274 | 11  | f914  | 13  |
| 44 | STRE | NC  | f942  | 14  |       |     |
| 45 | STRE | NC  | f1385 | 14  | f517  | 10  |
| 46 | STRE | CC  | f1285 | 15  | f1072 | 11  |
| 47 | STRE | NC  | f524  | -11 |       |     |
| 48 | STRE | CC  | f1274 | 10  |       |     |
| 49 | STRE | CC  | f1198 | 16  | f183  | 11  |
| 50 | STRE | CIC | f671  | 11  | f455  | 32  |
| 51 | BEND | CCC | f1615 | 17  |       |     |
| 52 | BEND | CNC | f434  | 60  |       |     |
| 53 | BEND | CNC | f1385 | 13  |       |     |
| 54 | BEND | HNC | f1164 | 57  |       |     |
| 55 | BEND | HNH | f1683 | 67  | f1619 | 11  |
| 56 | BEND | HNC | f1168 | -45 |       |     |
| 57 | BEND | HNH | f1678 | 53  | f1646 | 26  |
| 58 | BEND | HCC | f1443 | -23 | f1391 | -11 |
| 59 | BEND | HCC | f1519 | 54  | f1198 | 15  |
| 60 | BEND | HCC | f1632 | 17  | f1202 | -51 |
| 61 | BEND | HCC | f1321 | 72  |       |     |
| 62 | BEND | HCH | f1522 | -12 | f1460 | 11  |
| 63 | BEND | HCH | f1522 | 22  | f1489 | -27 |
| 64 | BEND | HCH | f1515 | -60 | f1149 | 25  |
| 65 | BEND | HCH | f1501 | -36 | f1460 | -17 |
| 66 | BEND | HCH | f1501 | 37  | f1460 | -17 |
| 67 | BEND | HCH | f1507 | 57  | f1260 | 10  |
| 68 | BEND | HCH | f1462 | 41  | f1460 | 10  |
| 69 | BEND | HCH | f1514 | -57 | f1149 | -23 |
| 70 | BEND | HCC | f1362 | 64  |       |     |
| 71 | BEND | HCH | f1499 | 61  | f1157 | -27 |
| 72 | BEND | HCH | f1508 | 53  | f1499 | -11 |
| 73 | BEND | HCH | f1425 | 10  | f1424 | 57  |

|     |      |      |       |     |       |     |
|-----|------|------|-------|-----|-------|-----|
| 74  | BEND | HCH  | f1524 | -28 | f1487 | -25 |
| 75  | BEND | CCN  | f1489 | 12  |       |     |
| 76  | BEND | NCO  | f422  | -48 |       |     |
| 77  | BEND | CCN  | f682  | 23  |       |     |
| 78  | BEND | CCC  | f758  | -13 |       |     |
| 79  | BEND | CCC  | f183  | 20  |       |     |
| 80  | BEND | CCC  | f182  | -16 | f169  | 22  |
| 81  | BEND | NCO  | f747  | -38 |       |     |
| 82  | BEND | CCC  | f1519 | 12  | f1030 | 74  |
| 83  | BEND | CCC  | f1615 | 11  | f650  | -40 |
| 84  | BEND | NCN  | f517  | 15  |       |     |
| 85  | BEND | CNC  | f347  | 12  | f343  | 22  |
| 86  | BEND | NCN  | f517  | 10  |       |     |
| 87  | BEND | CCO  | f438  | 52  | f376  | 11  |
| 88  | BEND | CCN  | f1487 | 10  | f468  | 14  |
| 89  | BEND | CCN  | f416  | 21  | f414  | -11 |
| 90  | BEND | CNC  | f470  | 15  |       |     |
| 91  | BEND | CNC  | f468  | 26  |       |     |
| 92  | BEND | CCO  | f706  | 10  | f626  | 10  |
| 93  | BEND | CNC  | f414  | -25 |       |     |
| 94  | BEND | CNC  | f419  | -19 | f418  | -37 |
| 95  | BEND | CNC  | f347  | 18  | f343  | -12 |
| 96  | BEND | CCC  | f143  | -16 | f27   | 13  |
| 97  | BEND | CCC  | f33   | 17  |       |     |
| 98  | BEND | CCC  | f201  | 21  |       |     |
| 99  | BEND | CICC | f343  | -17 | f333  | 23  |
| 100 | TORS | HNCN | f414  | 16  | f318  | 16  |
| 101 | TORS | HNCN | f566  | -68 |       |     |
| 102 | TORS | HNCN | f595  | 60  |       |     |
| 103 | TORS | HNCN | f422  | -10 | f376  | 39  |
| 104 | TORS | HCCC | f975  | 62  | f732  | -10 |
| 105 | TORS | HCCC | f968  | 32  | f956  | -24 |
| 106 | TORS | HCCC | f832  | 94  |       |     |
| 107 | TORS | HCCC | f855  | 21  | f830  | 48  |
| 108 | TORS | HCNC | f1260 | 18  | f1057 | -10 |
| 109 | TORS | HCNC | f1515 | -18 | f1149 | 69  |
| 110 | TORS | HCNC | f216  | 56  | f169  | -15 |
| 111 | TORS | HCNC | f1501 | 18  | f1157 | -34 |
| 112 | TORS | HCNC | f1157 | 35  | f109  | -20 |
| 113 | TORS | HCNC | f1507 | -17 | f1298 | 10  |
| 114 | TORS | HCNC | f1157 | -12 | f107  | -11 |

|     |      |       |       |     |       |     |
|-----|------|-------|-------|-----|-------|-----|
| 115 | TORS | HCNC  | f1514 | 13  | f1149 | 33  |
| 116 | TORS | HCCC  | f1443 | 18  | f1391 | -50 |
| 117 | TORS | HCNC  | f1499 | -20 | f1157 | 56  |
| 118 | TORS | HCNC  | f1508 | -14 | f1302 | 13  |
| 119 | TORS | HCNC  | f1149 | -41 | f213  | 22  |
| 120 | TORS | HCNC  | f1524 | -10 | f1267 | -14 |
| 121 | TORS | CCCC  | f14   | 56  |       |     |
| 122 | TORS | CCNC  | f107  | 45  |       |     |
| 123 | OUT  | CCCC  | f524  | 21  | f293  | -10 |
| 124 | TORS | CCCC  | f975  | -12 | f419  | 56  |
| 125 | TORS | CCCC  | f143  | -11 | f48   | 19  |
| 126 | TORS | CNCN  | f33   | -49 |       |     |
| 127 | TORS | CCCC  | f40   | 66  |       |     |
| 128 | TORS | CCNC  | f132  | -11 | f128  | -18 |
| 129 | TORS | CNCN  | f90   | 39  |       |     |
| 130 | TORS | CCNC  | f109  | 28  | f93   | 23  |
| 131 | TORS | CCCC  | f36   | 62  |       |     |
| 132 | TORS | CNCN  | f178  | -11 | f132  | -28 |
| 133 | TORS | CNCN  | f75   | 53  |       |     |
| 134 | TORS | CCCC  | f48   | 39  | f27   | 31  |
| 135 | OUT  | OCNC  | f787  | 50  |       |     |
| 136 | OUT  | OCNC  | f778  | -52 | f706  | 14  |
| 137 | OUT  | ONNC  | f763  | 70  |       |     |
| 138 | OUT  | ONNC  | f765  | 66  | f758  | 13  |
| 139 | OUT  | CICCC | f347  | 11  | f326  | -11 |
| 140 | OUT  | NCNC  | f700  | 32  | f690  | -21 |
| 141 | OUT  | NNCC  | f706  | -29 | f700  | 13  |
| 142 | OUT  | CCCN  | f178  | 29  | f132  | -15 |
| 143 | OUT  | CCCN  | f270  | -14 | f267  | -19 |
| 144 | OUT  | CCCN  | f270  | -25 | f267  | 33  |
| 145 | OUT  | CCCN  | f216  | -15 | f128  | 17  |
| 146 | OUT  | CCCC  | f293  | 11  |       |     |
| 147 | TORS | CCCC  | f732  | 48  | f27   | 11  |

### **Crystallographic data**

|                          |                                                                 |
|--------------------------|-----------------------------------------------------------------|
| Chemical formula         | C <sub>19</sub> H <sub>21</sub> ClN <sub>6</sub> O <sub>4</sub> |
| Molecular Weight (g/mol) | 432.87                                                          |
| space group              | Orthorhombic, P2 <sub>1</sub> 2 <sub>1</sub> 2 <sub>1</sub>     |
| Lattice Parameters (Å)   |                                                                 |
| a                        | 11.5365                                                         |
| b                        | 14.5935                                                         |
| c                        | 23.2102                                                         |
| Volume (Å <sup>3</sup> ) | 3907.62                                                         |
| Z                        | 8                                                               |
| μ (mm <sup>-1</sup> )    | 0.24                                                            |
| Temperature (K)          | 293                                                             |
| Radiation type           | Mo Kα                                                           |
| Crystal size (mm)        | 0.40 x 0.28 x 0.16                                              |
